# Supplementary material
Source: Research Square preprint supplement (doi:10.21203/rs.3.rs-10257239/v1)
Supplement: Supplementary file 1 [file efdbc6ab652ab6764d81b1b3.docx]

**Supplementary Informaion**

Thaw-induced degradation as a driver of methane emissions from low-Arctic polygonal peatlands in the Western Siberian Lowland for publication in *Wetlands*

Arina V. Larina1, Nikita B. Ustinov1, Georgiy O. Gavrilov1, Vladimir S. Kazantsev1, Andrey E. Belov1, Elena A. Tsvetnova1, Anna A. Usacheva1,2, and Elena A. Novikova3

1A.M. Obukhov Instutute of Atmospheric Physics, RAS, Greenhouse Gas Laboratory, Moscow, Russia

2Institute of Ore Deposits Geology, Petrography, Mineralogy and Geochemistry RAS, Moscow, Russia

3A.M. Obukhov Instutute of Atmospheric Physics, RAS, Laboratory of Atmosphere-Ocean Interaction, Moscow, Russia

Corresponding author: Nikita B. Ustinov ([nikustinov@ifaran.ru](mailto:nikustinov@ifaran.ru))

**Tables and Figures**

**Table SI1**. Characteristics of weather stations across the WSL low-Arctic tundra and forest-tundra ecotone, along with the years of missing data excluded from the analysis

| **Region** | **Station** | **Location** | **Observational period** | **Excluded years (> 5 days of missing data)** |
| --- | --- | --- | --- | --- |
| Low-Arctic tundra | Tazovsky | 67.485°N 78.719°E | 1939–2023 | 1949, 1954, 1977 |
| Noviy Port | 67.683°N 72.867°E | 1937–2023 | 1977, 2004, 2021 |
| Nyda | 66.625°N 72.925°E | 1948–2013 | 1977, 1999 |
| Forest-tundra ecotone | Nadym | 65.483°N 72.688°E | 1960–2023 | 1965, 1977 |
| Salekhard | 66.532°N 66.675°E | 1883–2023 | 1885, 1905, 1912, 1917–1922, 1923, 1929, 2019–2022 |
| Yanov Stan | 65.977°N 84.328°E | 1959–2024 | 1965, 1993–1997, 2017 |

**Table SI2**. Time series of measured CH4 fluxes and corresponding environmental variables throughout all field campaigns

| **Time of measurement** | | **Air pressure, hPa** | **WT depth, cm** | **AL thickness, cm** | **Temperature, ˚С** | | | | | | **Flux** | **∆Flux** |
| --- | --- | --- | --- | --- | --- | --- | --- | --- | --- | --- | --- | --- |
| **Air** | **Soil at depths, cm** | | | | | **mg CH4 m-2 h-1** | |
| **Start** | **End** | **0** | **5** | **10–15** | **15–30** | **30–50** |
| **Plot 1** | | | | | | | | | | | | |
| Flat polygon surface, 67.3728˚N; 78.6104 ˚E  Vegetation: *Andromeda polifolia, Vaccinium vitis−idaea, Ledum palustre, Betula nana, Rubus chamaemorus, Cladonia stellaris, C. rangiferina, C. cucullata*  27.07.2023 | | | | | | | | | | | | |
| 13:30 | 14:15 | 1001.6 | − | 23 | 23.4 | 20.9 | 21.2 | 21.7 | 16.5 | − | −0.07 | 0.05 |
| 13:30 | 14:15 | 1001.6 | − | 28 | 23.4 | 20.9 | 21.2 | 21.7 | 16.5 | − | −0.04 | 0.03 |
| 14:21 | 15:06 | 1000.1 | − | 23 | 27.6 | 24.5 | 23.4 | 22.2 | 15.8 | − | −0.01 | 0.16 |
| 14:21 | 15:06 | 1000.1 | − | 28 | 27.6 | 24.5 | 23.4 | 22.2 | 15.8 | − | −0.05 | 0.03 |
| 15:11 | 15:56 | 999.5 | − | 23 | 29.8 | 26.3 | 24.2 | 22.9 | 15.6 | − | 0.21 | 0.05 |
| 15:11 | 15:56 | 999.5 | − | 28 | 29.8 | 26.3 | 24.2 | 22.9 | 15.6 | − | 0.08 | 0.06 |
| 16:00 | 16:45 | 999.9 | − | 23 | 25.6 | 24.6 | 23.6 | 22.4 | 15.3 | − | −0.07 | 0.01 |
| 16:00 | 16:45 | 999.9 | − | 28 | 25.6 | 24.6 | 23.6 | 22.4 | 15.3 | − | 0.21 | 0.06 |
| 16:50 | 17:35 | 999.9 | − | 23 | 23.4 | 22.9 | 22.3 | 21.7 | 15.3 | − | −0.12 | 0.07 |
| 16:50 | 17:35 | 999.9 | − | 28 | 23.4 | 22.9 | 22.3 | 21.7 | 15.3 | − | −0.01 | 0.05 |
| 17:41 | 18:27 | 1000.5 | − | 23 | 21.6 | 20.6 | 20.4 | 20.4 | 15.3 | − | 0.04 | 0.03 |
| 17:41 | 18:27 | 1000.5 | − | 28 | 21.6 | 20.6 | 20.4 | 20.4 | 15.3 | − | −0.04 | 0.03 |
| 18:32 | 19:18 | 1000.3 | − | 23 | 21.3 | 20.2 | 19.9 | 19.7 | 14.9 | − | −0.05 | 0.05 |
| 18:32 | 19:18 | 1000.3 | − | 28 | 21.3 | 20.2 | 19.9 | 19.7 | 14.9 | − | −0.02 | 0.02 |
| 19:21 | 20:07 | 1000.3 | − | 23 | 20.1 | 19.8 | 19.6 | 19.2 | 14.5 | − | 0.06 | 0.07 |
| 19:21 | 20:07 | 1000.3 | − | 28 | 20.1 | 19.8 | 19.6 | 19.2 | 14.5 | − | 0.17 | 0.08 |
| Intermediate lawn, 67.3728 ˚N; 78.6103 ˚E,  Vegetation: *Andromeda polifolia, Carex rotundata, Sphagnum Sp.*  28.07.2023 | | | | | | | | | | | | |
| 10:30 | 11:00 | 998.6 | −16 | 28 | 23.3 | 24.0 | 16.8 | 12.4 | 8.8 | − | 1.93 | 0.03 |
| 10:30 | 11:00 | 998.6 | −16 | 28 | 23.3 | 24.0 | 16.8 | 12.4 | 8.8 | − | 0.96 | 0.08 |
| 11:05 | 11:35 | 998.4 | −16 | 28 | 27.1 | 24.7 | 17.2 | 12.7 | 8.8 | − | 1.72 | 0.02 |
| 11:05 | 11:35 | 998.4 | −16 | 28 | 27.1 | 24.7 | 17.2 | 12.7 | 8.8 | − | 1.11 | 0.07 |
| 11:40 | 12:10 | 998.2 | −16 | 28 | 25.2 | 23.5 | 17.3 | 12.8 | 8.8 | − | 1.48 | 0.12 |
| 11:40 | 12:11 | 998.2 | −16 | 28 | 25.2 | 23.5 | 17.3 | 12.8 | 8.8 | − | 0.99 | 0.49 |
| 12:16 | 12:47 | 997.8 | −16 | 28 | 25.6 | 26.3 | 17.8 | 12.9 | 8.7 | − | 1.46 | 0.17 |
| 12:17 | 12:47 | 997.8 | −16 | 28 | 25.6 | 26.3 | 17.8 | 12.9 | 8.7 | − | 1.02 | 0.05 |
| 12:50 | 13:20 | 997.6 | −16 | 28 | 27.3 | 27.1 | 18.4 | 13.1 | 8.7 | − | 1.72 | 0.12 |
| 12:50 | 13:20 | 997.6 | −16 | 28 | 27.3 | 27.1 | 18.4 | 13.1 | 8.7 | − | 1.06 | 0.05 |
| 13:25 | 13:55 | 997.5 | −16 | 28 | 28.0 | 28.6 | 18.8 | 13.3 | 8.8 | − | 2.02 | 0.12 |
| 13:25 | 13:55 | 997.5 | −16 | 28 | 28.0 | 28.6 | 18.8 | 13.3 | 8.8 | − | 0.90 | 0.07 |
| 14:00 | 14:30 | 997.5 | −16 | 28 | 26.8 | 28.4 | 19.3 | 13.5 | 8.8 | − | 1.43 | 0.2 |
| 14:00 | 14:30 | 997.5 | −16 | 28 | 26.8 | 28.4 | 19.3 | 13.5 | 8.8 | − | 0.78 | 0.18 |
| 14:35 | 15:05 | 997.7 | −16 | 28 | 24.6 | 24.1 | 18.7 | 13.7 | 8.8 | − | 1.59 | 0.08 |
| 14:35 | 15:05 | 997.7 | −16 | 28 | 24.6 | 24.1 | 18.7 | 13.7 | 8.8 | − | 0.67 | 0.14 |
| 07.08.2024–08.08.2024 | | | | | | | | | | | | |
| 17:31 | 18:01 | 1005.2 | −11 | 37 | 13.3 | − | 7.9 | 4.9 | − | − | 0.72 | 0.02 |
| 17:32 | 18:02 | 1005.2 | −12 | 37 | 13.3 | − | 7.9 | 4.9 | − | − | 1.33 | 0.16 |
| 18:13 | 18:43 | 1005.2 | −11 | 37 | 12.8 | − | 7.5 | 5.0 | − | − | 0.59 | 0.09 |
| 18:13 | 18:43 | 1005.2 | −12 | 37 | 12.8 | − | 7.5 | 5.0 | − | − | 1.33 | 0.02 |
| 18:50 | 19:23 | 1005.5 | −11 | 37 | 12.1 | − | 7.5 | 5.0 | − | − | 0.77 | 0.08 |
| 18:50 | 19:20 | 1005.5 | −12 | 37 | 12.1 | − | 7.5 | 5.0 | − | − | 1.12 | 0.15 |
| 19:30 | 20:00 | 1005.5 | −11 | 37 | 10.9 | − | 7.5 | 5.0 | − | − | 0.98 | 0.09 |
| 19:30 | 20:00 | 1005.5 | −12 | 37 | 10.9 | − | 7.5 | 5.0 | − | − | 1.39 | 0.09 |
| 20:08 | 20:38 | 1005.6 | −11 | 37 | 8.9 | − | 7.4 | 5.0 | − | − | 0.88 | 0.02 |
| 20:08 | 20:38 | 1005.6 | −12 | 37 | 8.9 | − | 7.4 | 5.0 | − | − | 1.42 | 0.02 |
| 22:56 | 23:26 | 1005.5 | −11 | 37 | 5.1 | − | 6.0 | 5.0 | − | − | 0.89 | 0.02 |
| 22:56 | 23:26 | 1005.5 | −12 | 37 | 5.1 | − | 6.0 | 5.0 | − | − | 1.48 | 0.02 |
| 00:54 | 01:24 | 1005.8 | −11 | 37 | 5.9 | − | 5.9 | 5.0 | − | − | 0.64 | 0.04 |
| 00:54 | 01:24 | 1005.8 | −12 | 37 | 5.9 | − | 5.9 | 5.0 | − | − | 1.35 | 0.07 |
| 02:53 | 03:23 | 1006.1 | −11 | 37 | 5.9 | − | 5.5 | 4.9 | − | − | 0.84 | 0.07 |
| 02:53 | 03:23 | 1006.1 | −12 | 37 | 5.9 | − | 5.5 | 4.9 | − | − | 1.37 | 0.09 |
| 05:02 | 05:32 | 1006.7 | −11 | 37 | 8.3 | − | 5.5 | 4.8 | − | − | 0.63 | 0.02 |
| 05:02 | 05:32 | 1006.7 | −12 | 37 | 8.3 | − | 5.5 | 4.8 | − | − | 1.37 | 0.09 |
| 07:00 | 07:20 | 1006.9 | −11 | 37 | 9.1 | − | 5.9 | 4.7 | − | − | 0.84 | 0.17 |
| 07:00 | 07:30 | 1006.9 | −12 | 37 | 9.1 | − | 5.9 | 4.7 | − | − | 1.42 | 0.02 |
| 08:56 | 09:26 | 1006.7 | −11 | 37 | 10 | − | 9.3 | 9.5 | − | − | 0.91 | 0.04 |
| 08:56 | 09:26 | 1006.7 | −12 | 37 | 10 | − | 9.3 | 9.5 | − | − | 1.42 | 0.03 |
| 10:54 | 11:24 | 1007.2 | −11 | 37 | 10.8 | − | 11.9 | 12.4 | − | − | 0.67 | 0.12 |
| 10:54 | 11:24 | 1007.2 | −12 | 37 | 10.8 | − | 11.9 | 12.4 | − | − | 1.22 | 0.02 |
| 12:55 | 13:25 | 1007.3 | −11 | 37 | 12.9 | − | 13.6 | 13.6 | − | − | 0.89 | 0.02 |
| 12:55 | 13:25 | 1007.3 | −12 | 37 | 12.9 | − | 13.6 | 13.6 | − | − | 1.31 | 0.07 |
| 15:00 | 15:30 | 1007.4 | −11 | 37 | 14.5 | − | 14.3 | 14.4 | − | − | 0.70 | 0.06 |
| 15:00 | 15:30 | 1007.4 | −12 | 37 | 14.5 | − | 14.3 | 14.4 | − | − | 1.38 | 0.06 |
| 25.06.2025–26.06.2025 | | | | | | | | | | | | |
| 7:22 | 7:56 | 1003.4 | −4 | 36 | 11.7 | 8.5 | 7.1 | 5.8 | 3.2 | − | 0.36 | 0.04 |
| 7:22 | 7:56 | 1003.4 | −9 | 35 | 11.7 | 8.5 | 7.1 | 5.8 | 3.2 | − | 1.84 | 0.08 |
| 9:00 | 9:30 | 1004.2 | −4 | 36 | 11.5 | 7.7 | 6.3 | 5.1 | 2.7 | − | 0.68 | 0.10 |
| 9:00 | 9:38 | 1004.2 | −9 | 35 | 11.5 | 7.7 | 6.3 | 5.1 | 2.7 | − | 1.60 | 0.02 |
| 11:01 | 11:31 | 1004.8 | −4 | 36 | 13.5 | 7.8 | 6.1 | 5.0 | 2.6 | − | 0.59 | 0.05 |
| 11:01 | 11:31 | 1004.8 | −9 | 35 | 13.5 | 7.8 | 6.1 | 5.0 | 2.6 | − | 1.61 | 0.08 |
| 13:00 | 13:30 | 1005.3 | −4 | 36 | 13.7 | 8.2 | 6.2 | 5.0 | 2.5 | − | 0.51 | 0.04 |
| 13:00 | 13:30 | 1005.3 | −9 | 35 | 13.7 | 8.2 | 6.2 | 5.0 | 2.5 | − | 1.67 | 0.20 |
| 15:00 | 15:30 | 1006.5 | −4 | 36 | 14.2 | 8.5 | 6.4 | 5.0 | 2.5 | − | 0.40 | 0.03 |
| 15:00 | 15:30 | 1006.5 | −9 | 35 | 14.2 | 8.5 | 6.4 | 5.0 | 2.5 | − | 1.58 | 0.04 |
| 17:00 | 17:30 | 1007.4 | −4 | 36 | 14.4 | 8.8 | 6.5 | 5.1 | 2.5 | − | 0.66 | 0.11 |
| 17:00 | 17:30 | 1007.4 | −9 | 35 | 14.4 | 8.8 | 6.5 | 5.1 | 2.5 | − | 1.66 | 0.07 |
| 19:00 | 19:30 | 1008.5 | −4 | 36 | 11.8 | 8.8 | 6.7 | 5.2 | 2.5 | − | 0.57 | 0.05 |
| 19:00 | 19:30 | 1008.5 | −9 | 35 | 11.8 | 8.8 | 6.7 | 5.2 | 2.5 | − | 1.76 | 0.38 |
| 21:00 | 21:30 | 1008.9 | −4 | 36 | 9.1 | 8.6 | 6.8 | 5.3 | 2.6 | − | 0.50 | 0.07 |
| 21:00 | 21:30 | 1008.9 | −9 | 35 | 9.1 | 8.6 | 6.8 | 5.3 | 2.6 | − | 1.70 | 0.03 |
| 23:00 | 23:30 | 1009.4 | −4 | 36 | 6.2 | 8.1 | 6.8 | 5.4 | 2.6 | − | 0.50 | 0.28 |
| 23:00 | 23:30 | 1009.4 | −9 | 35 | 6.2 | 8.1 | 6.8 | 5.4 | 2.6 | − | 1.34 | 0.20 |
| 1:00 | 1:30 | 1009.9 | −4 | 36 | 3.2 | 7.4 | 6.7 | 5.4 | 2.6 | − | 0.58 | 0.18 |
| 1:00 | 1:20 | 1009.9 | −9 | 35 | 3.2 | 7.4 | 6.7 | 5.4 | 2.6 | − | 1.36 | 0.20 |
| 3:00 | 3:30 | 1011.1 | −4 | 36 | 7.7 | 6.8 | 6.4 | 5.4 | 2.7 | − | 0.61 | 0.11 |
| 3:00 | 3:30 | 1011.1 | −9 | 35 | 7.7 | 6.8 | 6.4 | 5.4 | 2.7 | − | 1.31 | 0.19 |
| 5:00 | 5:30 | 1012.1 | −4 | 36 | 14.6 | 6.4 | 6.1 | 5.3 | 2.7 | − | 0.58 | 0.21 |
| 5:00 | 5:30 | 1012.1 | −9 | 35 | 14.6 | 6.4 | 6.1 | 5.3 | 2.7 | − | 1.28 | 0.23 |
| Water-saturated hollow, 67.3728 ˚N; 78.6102 ˚E  Vegetation: *Carex rotundata, Sphagnum Sp.*  29.07.2023 | | | | | | | | | | | | |
| 14:07 | 14:37 | 998.4 | 9 | 51 | 24.7 | 24.6 | 21.1 | 17.8 | − | 10.2 | 3.61 | 0.13 |
| 14:07 | 14:37 | 998.4 | 8.5 | 51 | 24.7 | 24.6 | 21.1 | 17.8 | − | 10.2 | 3.79 | 0.67 |
| 14:45 | 15:15 | 998.2 | 9 | 51 | 22.9 | 23.9 | 21.1 | 17.9 | − | 10.0 | 10.99 | 3.04 |
| 14:45 | 15:15 | 998.2 | 8.5 | 51 | 22.9 | 23.9 | 21.1 | 17.9 | − | 10.0 | 4.37 | 0.16 |
| 15:23 | 15:53 | 997.8 | 9 | 51 | 22.3 | 23.0 | 21.1 | 18.1 | − | 10.0 | 6.03 | 1.02 |
| 15:23 | 15:53 | 997.8 | 8.5 | 51 | 22.3 | 23.0 | 21.1 | 18.1 | − | 10.0 | 5.22 | 0.53 |
| 15:59 | 16:30 | 997.6 | 9 | 51 | 21.2 | 22.3 | 20.9 | 18.2 | − | 10.0 | 7.23 | 0.56 |
| 15:59 | 16:30 | 997.6 | 8.5 | 51 | 21.2 | 22.3 | 20.9 | 18.2 | − | 10.0 | 4.54 | 0.43 |
| 16:37 | 17:08 | 997.5 | 9 | 51 | 21.3 | 22.1 | 20.8 | 18.3 | − | 10.0 | 4.72 | 0.04 |
| 16:37 | 17:08 | 997.5 | 8.5 | 51 | 21.3 | 22.1 | 20.8 | 18.3 | − | 10.0 | 4.69 | 0.16 |
| 17:15 | 17:45 | 997.5 | 9 | 51 | 23.6 | 22.5 | 20.8 | 18.3 | − | 10.0 | 4.46 | 0.08 |
| 17:15 | 17:45 | 997.5 | 8.5 | 51 | 23.6 | 22.5 | 20.8 | 18.3 | − | 10.0 | 3.21 | 0.40 |
| 17:50 | 18:20 | 997.7 | 9 | 51 | 21.4 | 22.7 | 20.8 | 18.3 | − | 10.0 | 4.80 | 1.62 |
| 17:50 | 18:20 | 997.7 | 8.5 | 51 | 21.4 | 22.7 | 20.8 | 18.3 | − | 10.0 | 3.07 | 1.39 |
| 07.08.2024–08.08.2024 | | | | | | | | | | | | |
| 17:31 | 18:01 | 1005.2 | −9 | 42 | 13.3 | − | − | − | − | − | 2.10 | 0.04 |
| 17:32 | 18:02 | 1005.2 | −9 | 42 | 13.3 | − | − | − | − | − | 3.91 | 0.02 |
| 18:13 | 18:43 | 1005.2 | −9 | 42 | 12.8 | − | − | − | − | − | 2.00 | 0.03 |
| 18:13 | 18:43 | 1005.2 | −9 | 42 | 12.8 | − | − | − | − | − | 3.59 | 0.00 |
| 18:50 | 19:23 | 1005.5 | −9 | 42 | 12.1 | − | − | − | − | − | 1.99 | 0.14 |
| 18:50 | 19:20 | 1005.5 | −9 | 42 | 12.1 | − | − | − | − | − | 3.34 | 0.04 |
| 19:30 | 20:00 | 1005.5 | −9 | 42 | 10.9 | − | − | − | − | − | 1.78 | 0.06 |
| 19:30 | 20:00 | 1005.5 | −9 | 42 | 10.9 | − | − | − | − | − | 3.12 | 0.03 |
| 20:08 | 20:38 | 1005.6 | −9 | 42 | 8.9 | − | − | − | − | − | 1.60 | 0.07 |
| 20:08 | 20:38 | 1005.6 | −9 | 42 | 8.9 | − | − | − | − | − | 3.11 | 0.15 |
| 22:56 | 23:26 | 1005.5 | −9 | 42 | 5.1 | − | − | − | − | − | 1.58 | 0.05 |
| 22:56 | 23:26 | 1005.5 | −9 | 42 | 5.1 | − | − | − | − | − | 2.98 | 0.09 |
| 00:54 | 01:14 | 1005.8 | −9 | 42 | 5.9 | − | − | − | − | − | 1.81 | 0.18 |
| 00:54 | 01:24 | 1005.8 | −9 | 42 | 5.9 | − | − | − | − | − | 2.93 | 0.10 |
| 02:53 | 03:23 | 1006.1 | −9 | 42 | 5.9 | − | − | − | − | − | 1.64 | 0.05 |
| 02:53 | 03:23 | 1006.1 | −9 | 42 | 5.9 | − | − | − | − | − | 2.86 | 0.11 |
| 05:02 | 05:32 | 1006.7 | −9 | 42 | 8.3 | − | − | − | − | − | 1.81 | 0.06 |
| 05:02 | 05:32 | 1006.7 | −9 | 42 | 8.3 | − | − | − | − | − | 2.87 | 0.12 |
| 07:00 | 07:30 | 1006.9 | −9 | 42 | 9.1 | − | − | − | − | − | 2.09 | 0.04 |
| 07:00 | 07:30 | 1006.9 | −9 | 42 | 9.1 | − | − | − | − | − | 3.04 | 0.06 |
| 08:56 | 09:26 | 1006.7 | −9 | 42 | 10.0 | − | − | − | − | − | 2.62 | 0.49 |
| 08:56 | 09:26 | 1006.7 | −9 | 42 | 10.0 | − | − | − | − | − | 3.11 | 0.06 |
| 10:54 | 11:24 | 1007.2 | −9 | 42 | 10.8 | − | − | − | − | − | 2.62 | 0.49 |
| 10:54 | 11:24 | 1007.2 | −9 | 42 | 10.8 | − | − | − | − | − | 2.86 | 0.41 |
| 12:55 | 13:25 | 1007.3 | −9 | 42 | 12.9 | − | − | − | − | − | 2.44 | 0.95 |
| 12:55 | 13:25 | 1007.3 | −9 | 42 | 12.9 | − | − | − | − | − | 3.13 | 0.04 |
| 15:00 | 15:30 | 1007.4 | −9 | 42 | 14.5 | − | − | − | − | − | 3.57 | 0.05 |
| 15:00 | 15:30 | 1007.4 | −9 | 42 | 14.5 | − | − | − | − | − | 3.05 | 0.17 |
| 25.06.2025–26.06.2025 | | | | | | | | | | | | |
| 7:22 | 7:56 | 1003.4 | 8 | 42 | 11.7 | 10.2 | 9.2 | 8.1 | 5.6 | 3.5 | 1.69 | 0.21 |
| 7:22 | 7:56 | 1003.4 | 8 | 42 | 11.7 | 10.2 | 9.2 | 8.1 | 5.6 | 3.5 | 1.46 | 0.05 |
| 9:00 | 9:30 | 1004.2 | 8 | 42 | 11.5 | 9.8 | 8.5 | 7.3 | 4.9 | 2.4 | 1.17 | 0.01 |
| 9:00 | 9:38 | 1004.2 | 8 | 42 | 11.5 | 9.8 | 8.5 | 7.3 | 4.9 | 2.4 | 1.08 | 0.09 |
| 11:01 | 11:31 | 1004.8 | 8 | 42 | 13.5 | 9.9 | 8.4 | 7.2 | 4.8 | 2.3 | 1.50 | 0.07 |
| 11:01 | 11:31 | 1004.8 | 8 | 42 | 13.5 | 9.9 | 8.4 | 7.2 | 4.8 | 2.3 | 1.63 | 0.03 |
| 13:00 | 13:30 | 1005.3 | 8 | 42 | 13.7 | 10.2 | 8.4 | 7.1 | 4.8 | 2.3 | 1.54 | 0.09 |
| 13:00 | 13:30 | 1005.3 | 8 | 42 | 13.7 | 10.2 | 8.4 | 7.1 | 4.8 | 2.3 | 1.94 | 0.09 |
| 15:00 | 15:30 | 1006.5 | 8 | 42 | 14.2 | 10.7 | 8.6 | 7.2 | 4.8 | 2.3 | 1.99 | 0.03 |
| 15:00 | 15:30 | 1006.5 | 8 | 42 | 14.2 | 10.7 | 8.6 | 7.2 | 4.8 | 2.3 | 1.94 | 0.07 |
| 17:00 | 17:30 | 1007.4 | 8 | 42 | 14.4 | 11.2 | 8.9 | 7.2 | 4.8 | 2.3 | 1.72 | 0.02 |
| 17:00 | 17:30 | 1007.4 | 8 | 42 | 14.4 | 11.2 | 8.9 | 7.2 | 4.8 | 2.3 | 1.78 | 0.16 |
| 19:00 | 19:30 | 1008.5 | 8 | 42 | 11.8 | 11.5 | 9.1 | 7.4 | 4.8 | 2.3 | 1.76 | 0.11 |
| 19:00 | 19:30 | 1008.5 | 8 | 42 | 11.8 | 11.5 | 9.1 | 7.4 | 4.8 | 2.3 | 1.70 | 0.07 |
| 21:00 | 21:30 | 1008.9 | 8 | 42 | 9.1 | 11.5 | 9.4 | 7.5 | 4.8 | 2.3 | 1.73 | 0.24 |
| 21:00 | 21:30 | 1008.9 | 8 | 42 | 9.1 | 11.5 | 9.4 | 7.5 | 4.8 | 2.3 | 1.65 | 0.06 |
| 23:00 | 23:30 | 1009.4 | 8 | 42 | 6.2 | 11.2 | 9.5 | 7.7 | 4.9 | 2.3 | 1.35 | 0.03 |
| 23:00 | 23:30 | 1009.4 | 8 | 42 | 6.2 | 11.2 | 9.5 | 7.7 | 4.9 | 2.3 | 1.78 | 0.12 |
| 1:00 | 1:30 | 1009.9 | 8 | 42 | 3.2 | 10.6 | 9.4 | 7.7 | 4.9 | 2.3 | 1.44 | 0.12 |
| 1:00 | 1:20 | 1009.9 | 8 | 42 | 3.2 | 10.6 | 9.4 | 7.7 | 4.9 | 2.3 | 1.42 | 0.08 |
| 3:00 | 3:30 | 1011.1 | 8 | 42 | 7.7 | 10.0 | 9.2 | 7.8 | 5.0 | 2.3 | 1.17 | 0.05 |
| 3:00 | 3:30 | 1011.1 | 8 | 42 | 7.7 | 10.0 | 9.2 | 7.8 | 5.0 | 2.3 | 1.49 | 0.11 |
| 5:00 | 5:30 | 1012.1 | 8 | 42 | 14.6 | 9.4 | 8.9 | 7.7 | 5.0 | 2.4 | 1.65 | 0.03 |
| 5:00 | 5:30 | 1012.1 | 8 | 42 | 14.6 | 9.4 | 8.9 | 7.7 | 5.0 | 2.4 | 1.46 | 0.05 |
| **Plot 2** | | | | | | | | | | | | |
| Flat polygon surface, 67.3800 ˚N; 78.5913 ˚E  Vegetation: *Ledum palustre, Rubus chamaemorus, Cladonia stellaris, C. rangiferina, C. cucullata*  30.07.2023 | | | | | | | | | | | | |
| 11:54 | 12:40 | 1009.0 | − | 29 | 18.3 | 17.2 | 15.8 | 13.7 | 8.5 | − | 0.35 | 0.18 |
| 12:45 | 13:30 | 1009.6 | − | 26.5 | 18.9 | 17.1 | 15.7 | 13.5 | 8.4 | − | 0.02 | 0.02 |
| 12:45 | 13:30 | 1009.6 | − | 29 | 18.9 | 17.1 | 15.7 | 13.5 | 8.4 | − | 0.24 | 0.04 |
| 13:36 | 14:21 | 1010.1 | − | 26.5 | 18.1 | 17.0 | 15.6 | 13.5 | 8.4 | − | 0.01 | 0.02 |
| 13:36 | 14:21 | 1010.1 | − | 29 | 18.1 | 17.0 | 15.6 | 13.5 | 8.4 | − | 0.18 | 0.05 |
| 14:26 | 15:11 | 1010.2 | − | 26.5 | 19.1 | 17.4 | 15.6 | 13.6 | 8.5 | − | 0.01 | 0.02 |
| 14:26 | 15:11 | 1010.2 | − | 29 | 19.1 | 17.4 | 15.6 | 13.6 | 8.5 | − | 0.12 | 0.06 |
| 15:15 | 16:00 | 1010.3 | − | 26.5 | 19.3 | 17.6 | 15.7 | 13.5 | 8.4 | − | 0.01 | 0.01 |
| 15:15 | 16:00 | 1010.3 | − | 29 | 19.3 | 17.6 | 15.7 | 13.5 | 8.4 | − | 0.06 | 0.05 |
| 16:06 | 16:51 | 1010.3 | − | 26.5 | 18.5 | 17.6 | 15.7 | 13.5 | 8.4 | − | 0.02 | 0.01 |
| 16:06 | 16:51 | 1010.3 | − | 29 | 18.5 | 17.6 | 15.7 | 13.5 | 8.4 | − | 0.17 | 0.2 |
| 16:56 | 17:41 | 1010.4 | − | 26.5 | 18.6 | 17.2 | 15.7 | 13.5 | 8.3 | − | 0.00 | 0.00 |
| 16:56 | 17:26 | 1010.4 | − | 29 | 18.6 | 17.2 | 15.7 | 13.5 | 8.3 | − | −0.01 | 0.05 |
| 17:46 | 18:32 | 1010.9 | − | 26.5 | 18.2 | 16.7 | 15.5 | 13.4 | 8.3 | − | 0.02 | 0.01 |
| 17:46 | 18:32 | 1010.9 | − | 29 | 18.2 | 16.7 | 15.5 | 13.4 | 8.3 | − | −0.14 | 0.14 |
| Water−saturated hollow, 67.3799 ˚N; 78.5910 ˚E  Vegetation: *Carex rotundata; Sphagnum sp.*  31.07.2023 | | | | | | | | | | | | |
| 11:45 | 12:16 | 1011.4 | 3 | 54.5 | 19.6 | 20.9 | 19.7 | 15.7 | − | 10.6 | 7.58 | 0.52 |
| 11:45 | 12:16 | 1011.4 | 2.5 | 54 | 19.6 | 20.9 | 19.7 | 15.7 | − | 10.6 | 5.15 | 1.86 |
| 12:20 | 12:50 | 1011.3 | 3 | 54.5 | 20.7 | 21.8 | 20.9 | 16.1 | − | 10.6 | 6.72 | 0.21 |
| 12:20 | 12:50 | 1011.3 | 2.5 | 54 | 20.7 | 21.8 | 20.9 | 16.1 | − | 10.6 | 4.19 | 0.10 |
| 12:55 | 13:25 | 1011.1 | 3 | 54.5 | 20.8 | 21.5 | 21.5 | 16.6 | − | 10.6 | 7.05 | 0.18 |
| 12:55 | 13:25 | 1011.1 | 2.5 | 54 | 20.8 | 21.5 | 21.5 | 16.6 | − | 10.6 | 4.37 | 0.21 |
| 13:30 | 14:00 | 1011.1 | 3 | 54.5 | 20.9 | 21.5 | 21.5 | 17.0 | − | 10.6 | 5.56 | 1.22 |
| 13:30 | 14:00 | 1011.1 | 2.5 | 54 | 20.9 | 21.5 | 21.5 | 17.0 | − | 10.6 | 4.69 | 0.17 |
| 14:07 | 14:37 | 1010.9 | 3 | 54.5 | 21.6 | 21.9 | 21.9 | 17.3 | − | 10.5 | 6.94 | 0.06 |
| 14:07 | 14:37 | 1010.9 | 2.5 | 54 | 21.6 | 21.9 | 21.9 | 17.3 | − | 10.5 | 4.98 | 0.20 |
| 14:46 | 15:16 | 1010.9 | 3 | 54.5 | 21.2 | 20.9 | 21.6 | 17.7 | − | 10.5 | 6.77 | 0.28 |
| 14:46 | 15:16 | 1010.9 | 2.5 | 54 | 21.2 | 20.9 | 21.6 | 17.7 | − | 10.5 | 4.87 | 0.24 |
| 15:21 | 15:40 | 1011.1 | 3 | 54.5 | 20.8 | 20.2 | 21.0 | 17.9 | − | 10.5 | 5.89 | 0.24 |
| 15:21 | 15:50 | 1011.1 | 2.5 | 54 | 20.8 | 20.1 | 21.0 | 17.9 | − | 10.5 | 4.49 | 0.15 |
| 15:55 | 16:25 | 1011.1 | 3 | 54.5 | 21.3 | 20.2 | 20.6 | 17.9 | − | 10.5 | 6.00 | 0.12 |
| 15:55 | 16:25 | 1011.1 | 2.5 | 54 | 21.3 | 20.2 | 20.6 | 17.9 | − | 10.5 | 4.55 | 0.08 |
| **Plot 3** | | | | | | | | | | | | |
| Flat polygon surface, 67.3745 ˚N; 78.6427 ˚E  Vegetation: *Ledum palustre, Rubus chamaemorus, Cladonia stellaris, C. rangiferina*  05.08.2023 | | | | | | | | | | | | |
| 12:00 | 12:45 | 1017.3 | − | 33 | 28.8 | 34.4 | 20.9 | 14.4 | 5.7 | − | 0.14 | 0.12 |
| 12:00 | 12:45 | 1017.3 | − | 37 | 28.8 | 34.4 | 20.9 | 14.4 | 5.7 | − | −0.17 | 0.12 |
| 12:49 | 13:34 | 1017.2 | − | 33 | 28.1 | 31.1 | 20.4 | 13.8 | 5.0 | − | −0.01 | 0.05 |
| 12:49 | 13:34 | 1017.2 | − | 37 | 28.1 | 31.1 | 20.4 | 13.8 | 5.0 | − | −0.09 | 0.05 |
| 13:39 | 14:24 | 1017.0 | − | 33 | 27.8 | 28.5 | 19.8 | 13.6 | 4.7 | − | −0.16 | 0.16 |
| 13:39 | 14:24 | 1017.0 | − | 37 | 27.8 | 28.5 | 19.8 | 13.6 | 4.7 | − | −0.21 | 0.10 |
| 14:28 | 15:13 | 1016.6 | − | 33 | 27.2 | 27.2 | 19.3 | 13.4 | 4.6 | − | 0.12 | 0.06 |
| 14:28 | 15:13 | 1016.6 | − | 37 | 27.2 | 27.2 | 19.3 | 13.4 | 4.6 | − | −0.03 | 0.13 |
| 15:17 | 16:02 | 1016.3 | − | 33 | 27.6 | 26.1 | 18.9 | 13.3 | 4.5 | − | −0.26 | 0.12 |
| 15:17 | 16:02 | 1016.3 | − | 37 | 27.6 | 26.1 | 18.9 | 13.3 | 4.5 | − | 0.00 | 0.06 |
| 16:07 | 16:52 | 1016.2 | − | 33 | 27.3 | 25.1 | 18.3 | 13.2 | 4.5 | − | −0.09 | 0.20 |
| 16:07 | 16:52 | 1016.2 | − | 37 | 27.3 | 25.1 | 18.3 | 13.2 | 4.5 | − | −0.16 | 0.05 |
| 16:57 | 17:42 | 1015.9 | − | 33 | 26.6 | 23.9 | 17.7 | 13.0 | 4.4 | − | −0.02 | 0.01 |
| 16:57 | 17:42 | 1015.9 | − | 37 | 26.6 | 23.9 | 17.7 | 13.0 | 4.4 | − | −0.20 | 0.07 |
| 17:47 | 18:32 | 1015.7 | − | 33 | 25.5 | 22.2 | 17.1 | 12.8 | 4.4 | − | −0.09 | 0.03 |
| 17:47 | 18:32 | 1015.7 | − | 37 | 25.5 | 22.2 | 17.1 | 12.8 | 4.4 | − | −0.02 | 0.12 |
| Intermediate lawn, 67.3745 ˚N; 78.6427 ˚E  Vegetation: *Vaccinium vitis−idaea, Andromeda polifolia, Rubus chamaemorus, Eriophorum sp., Sphagnum sp.*  07.08.2023 | | | | | | | | | | | | |
| 10:41 | 11:11 | 1012.6 | −27 | 46 | 26.7 | 28.9 | 15.2 | 8.3 | 4.5 | 2.3 | 1.37 | 0.09 |
| 10:41 | 11:11 | 1012.6 | −27 | 40 | 26.7 | 28.9 | 15.2 | 8.3 | 4.5 | 2.3 | 0.41 | 0.04 |
| 11:15 | 11:45 | 1012.3 | −27 | 46 | 26.3 | 26.0 | 14.6 | 8.5 | 4.4 | 2.3 | 0.98 | 0.09 |
| 11:15 | 11:45 | 1012.3 | −27 | 40 | 26.3 | 26.0 | 14.6 | 8.5 | 4.4 | 2.3 | 0.37 | 0.09 |
| 11:50 | 12:20 | 1012.2 | −27 | 46 | 27.1 | 32.4 | 14.8 | 8.7 | 4.4 | 2.3 | 0.88 | 0.21 |
| 12:24 | 12:54 | 1011.9 | −27 | 46 | 27.1 | 34.7 | 15.6 | 8.9 | 4.4 | 2.3 | 0.94 | 0.06 |
| 12:24 | 12:54 | 1011.9 | −27 | 40 | 27.1 | 34.7 | 15.6 | 8.9 | 4.4 | 2.3 | 0.55 | 0.15 |
| 14:09 | 14:39 | 1011.4 | −27 | 46 | 27.6 | 29.7 | 16.3 | 9.5 | 4.5 | 2.3 | 0.91 | 0.31 |
| Inter-polygonal trough, 67.3745 ˚N; 78.6427 ˚E  Vegetation: *Eriophorum sp., Sphagnum sp.*  06.08.2023 | | | | | | | | | | | | |
| 9:43 | 10:13 | 1006.6 | −11 | 52.5 | 24.3 | 23.6 | 14.2 | 12.5 | 9.0 | 2.9 | 7.40 | 2.62 |
| 9:43 | 10:13 | 1006.6 | −14 | 53 | 24.3 | 23.6 | 14.2 | 12.5 | 9.0 | 2.9 | 8.97 | 2.96 |
| 10:18 | 10:48 | 1006.4 | −11 | 52.5 | 24.8 | 25.6 | 14.9 | 12.6 | 8.9 | 2.9 | 6.06 | 0.18 |
| 10:18 | 10:48 | 1006.4 | −14 | 53 | 24.8 | 25.6 | 14.9 | 12.6 | 8.9 | 2.9 | 5.07 | 0.09 |
| 10:53 | 11:23 | 1006.3 | −11 | 52.5 | 25.4 | 26.3 | 15.4 | 12.7 | 8.9 | 2.9 | 5.91 | 0.13 |
| 10:53 | 11:23 | 1006.3 | −14 | 53 | 25.4 | 26.3 | 15.4 | 12.7 | 8.9 | 2.9 | 4.29 | 0.08 |
| 11:28 | 11:58 | 1006.0 | −11 | 52.5 | 26.4 | 26.3 | 16.0 | 12.8 | 8.9 | 2.9 | 5.28 | 0.02 |
| 11:28 | 11:58 | 1006.0 | −14 | 53 | 26.4 | 26.3 | 16.0 | 12.8 | 8.9 | 2.9 | 4.17 | 0.41 |
| 12:03 | 12:33 | 1005.7 | −11 | 52.5 | 26.0 | 26.1 | 16.4 | 13.0 | 8.9 | 2.9 | 6.35 | 0.32 |
| 12:03 | 12:33 | 1005.7 | −14 | 53 | 26.0 | 26.1 | 16.4 | 13.0 | 8.9 | 2.9 | 5.53 | 0.27 |
| 12:38 | 13:08 | 1005.6 | −11 | 52.5 | 27.0 | 26.0 | 16.7 | 13.1 | 8.8 | 2.9 | 5.67 | 0.42 |
| 12:38 | 13:08 | 1005.6 | −14 | 53 | 27.0 | 26.0 | 16.7 | 13.1 | 8.8 | 2.9 | 4.31 | 0.21 |
| 13:13 | 13:43 | 1005.6 | −11 | 52.5 | 26.4 | 26.0 | 17.0 | 13.3 | 8.8 | 2.9 | 6.21 | 1.59 |
| 13:13 | 13:43 | 1005.6 | −14 | 53 | 26.4 | 26.0 | 17.0 | 13.3 | 8.8 | 2.9 | 4.97 | 0.59 |
| 13:48 | 14:18 | 1005.3 | −11 | 52.5 | 27.3 | 25.6 | 17.3 | 13.5 | 8.8 | 2.9 | 5.85 | 0.26 |
| 13:48 | 14:18 | 1005.3 | −14 | 53 | 27.3 | 25.6 | 17.3 | 13.5 | 8.8 | 2.9 | 7.61 | 0.82 |
| Water−saturated hollow, 67.3744 ˚N; 78.6434 ˚E  Vegetation: *Eriophorum sp., Sphagnum sp.*  07.08.2023 | | | | | | | | | | | | |
| 11:00 | 11:30 | 1005.4 | −3.5 | 60 | 24.9 | 26.6 | 17.8 | 15.7 | 10.5 | 4.0 | 1.53 | 0.03 |
| 11:00 | 11:30 | 1005.4 | −1.5 | 60 | 24.9 | 26.6 | 17.8 | 15.7 | 10.5 | 4.0 | 0.82 | 0.20 |
| 11:34 | 12:05 | 1005.3 | −3.5 | 60 | 25.1 | 26.8 | 18.1 | 15.8 | 10.5 | 4.0 | 2.14 | 0.01 |
| 11:34 | 12:05 | 1005.3 | −1.5 | 60 | 25.1 | 26.8 | 18.1 | 15.8 | 10.5 | 4.0 | 1.95 | 0.12 |
| 12:10 | 12:40 | 1005.3 | −3.5 | 60 | 26.1 | 26.8 | 18.3 | 15.9 | 10.5 | 4.0 | 3.17 | 0.24 |
| 12:10 | 12:40 | 1005.3 | −1.5 | 60 | 26.1 | 26.8 | 18.3 | 15.9 | 10.5 | 4.0 | 2.33 | 0.28 |
| 12:45 | 13:15 | 1005.1 | −3.5 | 60 | 24.8 | 25.9 | 18.6 | 16.1 | 10.5 | 4.0 | 2.51 | 0.34 |
| 12:45 | 13:15 | 1005.1 | −1.5 | 60 | 24.8 | 25.9 | 18.6 | 16.1 | 10.5 | 4.0 | 2.70 | 0.62 |
| 13:23 | 13:53 | 1005.2 | −3.5 | 60 | 24.6 | 24.9 | 18.7 | 16.3 | 10.5 | 4.0 | 3.57 | 0.46 |
| 13:23 | 13:53 | 1005.2 | −1.5 | 60 | 24.6 | 24.9 | 18.7 | 16.3 | 10.5 | 4.0 | 3.13 | 0.45 |
| 13:58 | 14:28 | 1005.2 | −3.5 | 60 | 24.9 | 24.8 | 18.9 | 16.5 | 10.5 | 4.0 | 3.48 | 0.39 |
| 13:58 | 14:28 | 1005.2 | −1.5 | 60 | 24.9 | 24.8 | 18.9 | 16.5 | 10.5 | 4.0 | 3.03 | 0.41 |
| 14:36 | 15:06 | 1005.3 | −3.5 | 60 | 25.3 | 24.7 | 19.1 | 16.7 | 10.5 | 4.0 | 4.54 | 0.32 |
| 14:36 | 15:06 | 1005.3 | −1.5 | 60 | 25.3 | 24.7 | 19.1 | 16.7 | 10.5 | 4.0 | 4.73 | 0.02 |

**Table S3**. Statistical characteristics of CH4 fluxes measured from distinct microsite types

| **Microsite type** | **Sample size** | **Min** | **Max** | **Mean** | **Dispersion** | **Standard deviation** | **p-value (Shapiro-Wilk)** | **Normality assumption** |
| --- | --- | --- | --- | --- | --- | --- | --- | --- |
| Intermediate lawns | 76 | 0.37 | 2.02 | 1.25 | 0.17 | 0.41 | 0.09 | Yes |
| Water-saturated hollows | 96 | 0.36 | 10.99 | 3.11 | 3.87 | 1.97 | 0.00 | No |
| Inter-polygonal troughs | 16 | 4.17 | 8.97 | 5.85 | 1.68 | 1.29 | 0.25 | Yes |
| Flat polygon surfaces | 47 | -0.26 | 0.35 | 0.00 | 0.02 | 0.13 | 0.37 | Yes |

**
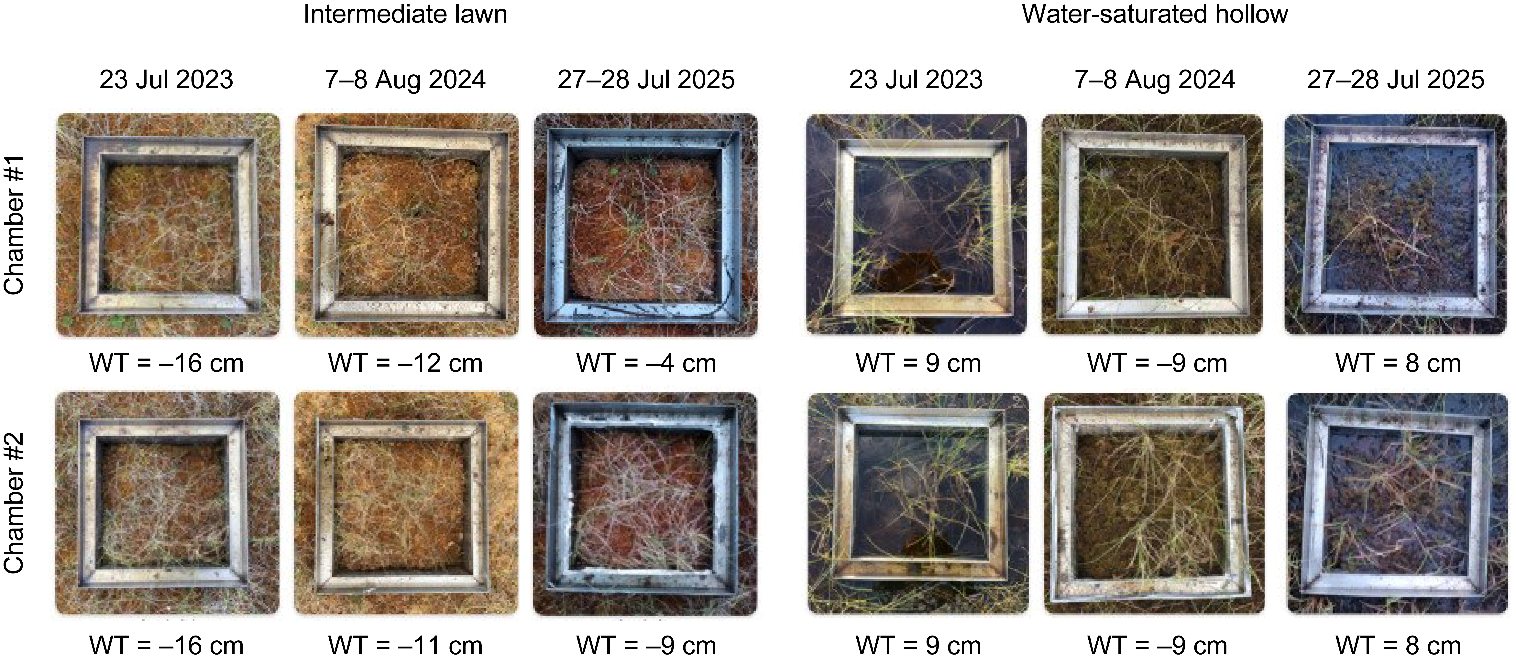
**

**Fig. S1**. Observed vegetation patterns and corresponding WT levels inside the chambers installed at the microsites of diurnal CH4 flux measurements
